# Supplementary material for: Exploring Factors Associated with Stunting in 6-Month-Old Children: A Population-Based Cohort Study in Sulawesi, Indonesia
Source: MDPI journal article supplement (doi:10.3390/nu15153420), 2023-08-01
Supplement: s1 [file s1]

**Table S1.** Food Frequency Questionnaires of the Study (FFQ).

Respondent ID : .....

Date : ...../...../.....

Coordinator check date : ...../...../.....

| No | Food group/ type    | Weight<br>per<br>portion | Portion      | Frequency |                |                  |                 |                 |          |
|----|---------------------|--------------------------|--------------|-----------|----------------|------------------|-----------------|-----------------|----------|
|    |                     |                          |              | Never     | 1 per<br>month | 2-3 per<br>month | 1-2 per<br>week | 3-4 per<br>week | Everyday |
| I  | Carbohydrate        |                          |              |           |                |                  |                 |                 |          |
|    | Rice                | 100                      | ¾ glass      |           |                |                  |                 |                 |          |
|    | Brown rice          | 100                      | ¾ glass      |           |                |                  |                 |                 |          |
|    | Yellow corn (sweet) | 200                      | 1 pc (lrg)   |           |                |                  |                 |                 |          |
|    | White corn          | 50                       | ½ glass      |           |                |                  |                 |                 |          |
|    | Purple sweet potato | 100                      | 1 pc (med)   |           |                |                  |                 |                 |          |
|    | Red sweet potato    | 150                      | 1 pc (med)   |           |                |                  |                 |                 |          |
|    | Cassava             | 100                      | 1 pc (med)   |           |                |                  |                 |                 |          |
|    | Rice noodles        | 100                      | 1 glass      |           |                |                  |                 |                 |          |
|    | Wet noodles         | 100                      | 1 glass      |           |                |                  |                 |                 |          |
|    | Dry noodles         | 50                       | 1 glass      |           |                |                  |                 |                 |          |
|    | Instant noodles     | 68                       | 1 ¼          |           |                |                  |                 |                 |          |
|    | Macaroni            | 100                      | 1 glass      |           |                |                  |                 |                 |          |
|    | Potato              | 100                      | 2 pcs (med)  |           |                |                  |                 |                 |          |
|    | Sago powder         | 40                       | 7 tbsp.      |           |                |                  |                 |                 |          |
|    | Flour               | 5                        | 1 tbsp.      |           |                |                  |                 |                 |          |
|    | Bread               | 20                       | 1 slice      |           |                |                  |                 |                 |          |
|    | Wholemeal bread     | 100                      | 2 slices     |           |                |                  |                 |                 |          |
|    | .....               |                          |              |           |                |                  |                 |                 |          |
|    | .....               |                          |              |           |                |                  |                 |                 |          |
|    | .....               |                          |              |           |                |                  |                 |                 |          |
| II | Protein             |                          |              |           |                |                  |                 |                 |          |
|    | Animal-source       |                          |              |           |                |                  |                 |                 |          |
|    | Beef                | 50                       | 1 (med) cut  |           |                |                  |                 |                 |          |
|    | Lamb                | 50                       | 1 (med) cut  |           |                |                  |                 |                 |          |
|    | Meatball            | 100                      | 10 pcs (lrg) |           |                |                  |                 |                 |          |
|    | Shrimp              | 200                      | 1 glass      |           |                |                  |                 |                 |          |
|    | Squid               | 134                      | 1 pc         |           |                |                  |                 |                 |          |
|    | Mackerel Tuna       | 50                       | 1 (med) cut  |           |                |                  |                 |                 |          |
|    | Sardine             | 50                       | 1 (med) cut  |           |                |                  |                 |                 |          |
|    | Skipjack            | 50                       | 1 (med) cut  |           |                |                  |                 |                 |          |
|    | Dried anchovy       | 8                        | 1 tbsp.      |           |                |                  |                 |                 |          |
|    | Salted fish         | 25                       | 1 (med) cut  |           |                |                  |                 |                 |          |
|    | Scallop             | 9                        | 1 pc         |           |                |                  |                 |                 |          |
|    | Chicken             | 50                       | 1 (med) cut  |           |                |                  |                 |                 |          |
|    | Shrimp              | 45                       | 1 (med) cut  |           |                |                  |                 |                 |          |
|    | Liver (Beef)        | 25                       | 1 (sml) cut  |           |                |                  |                 |                 |          |
|    | Liver (Chicken)     | 50                       | 2 pcs        |           |                |                  |                 |                 |          |
|    | Duck                | 45                       | 1 (med) cut  |           |                |                  |                 |                 |          |
|    | Chicken eggs        | 60                       | 1 pc         |           |                |                  |                 |                 |          |
|    | Free-range chicken  |                          |              |           |                |                  |                 |                 |          |
|    | eggs                | 50                       | 2 pcs        |           |                |                  |                 |                 |          |
|    | Quail eggs          | 55                       | 5 pcs        |           |                |                  |                 |                 |          |
|    | Cheese              | 15                       | 1 (sml) cut  |           |                |                  |                 |                 |          |
|    | .....               |                          |              |           |                |                  |                 |                 |          |
|    | .....               |                          |              |           |                |                  |                 |                 |          |
|    | .....               |                          |              |           |                |                  |                 |                 |          |
|    | Plant-source        |                          |              |           |                |                  |                 |                 |          |
|    | Tofu                | 100                      | 1 pc (lrg)   |           |                |                  |                 |                 |          |
|    | Tempe               | 25                       | 1 (med) cut  |           |                |                  |                 |                 |          |

|                |    |           |
|----------------|----|-----------|
| Soybeans       | 15 | 1.5 tbsp. |
| Mung beans     | 25 | 2.5 tbsp. |
| Red beans      | 25 | 2.5 tbsp. |
| Peeled peanuts | 20 | 2 tbsp.   |

.....  
.....  
.....

| III | Vegetables           |     |             |
|-----|----------------------|-----|-------------|
|     | Spinach              | 125 | 1 bunch     |
|     | Water spinach        | 100 | 1 glass     |
|     | Mushroom             | 100 | 1 glass     |
|     | Melinjo/ Ganemo      |     |             |
|     | leaves               | 50  | 1 glass     |
|     | Beans                | 100 | 15 pcs      |
|     | Sprouts              | 50  | 1 glass     |
|     | Eggplant/ Popoki     | 100 | 1 glass     |
|     | Japanese Cucumber    | 100 | 1 (med) cut |
|     | Mustard greens       | 41  | 1 pc        |
|     | Cabbage              | 100 | 1 (med) cut |
|     | Broccoli             | 100 | 1 (med) cut |
|     | Celery               | 100 | 5 bunches   |
|     | Carrots              | 100 | 1 glass     |
|     | Cassava leaves       | 104 | 1 bunch     |
|     | Potato               | 200 | 2 pcs       |
|     | Katuk leaves         | 50  | 1 glass     |
|     | Basil leaves         | 100 | 35 pck      |
|     | Long beans           | 15  | 1 pc        |
|     | Cucumber             | 83  | 1 pc (med)  |
|     | Bitter melon         | 70  | 1 pc (med)  |
|     | Tomato               | 43  | 1 pc (lrg)  |
|     | Lettuce              | 50  | 1 glass     |
|     | Young jackfruit      | 100 | 1 glass     |
|     | Banana flower/ heart | 50  | 1 glass     |
|     | Papaya leaves        | 50  | 1 glass     |
|     | .....                |     |             |
|     | .....                |     |             |
|     | .....                |     |             |

| IV | Fruits                      |      |              |
|----|-----------------------------|------|--------------|
|    | Papaya                      | 100  | 1 (med) cut  |
|    | Plantain                    | 50   | 1 pc (med)   |
|    | Ambon baban                 | 75   | 1 pc (med)   |
|    | Pisang mas                  | 40   | 2 pcs        |
|    | Pisang kepok/ pisang sepatu | 45   | 1 pc         |
|    | Banana of Ambon             | 75   | 1 pc (med)   |
|    | Apple                       | 75   | 1.5 pc (lrg) |
|    | Orange                      | 100  | 1 pc (med)   |
|    | Durian                      | 17,5 | 1 pc (med)   |
|    | Pineapple                   | 73   | 1 pc (med)   |
|    | Water apple                 | 50   | 1 pc (med)   |
|    | Langsat/ Duku               | 8,9  | 1 pc (med)   |
|    | Kedondong                   | 60   | 1 pc (med)   |
|    | Rambutan                    | 9,4  | 1 pc         |
|    | Mango                       | 50   | ½ pc         |
|    | Melon                       | 150  | 1 cut (lrg)  |
|    | Avocado                     | 50   | 1.5 pc (med) |
|    | Grapes                      | 75   | 10 pcs       |
|    | Watermelon                  | 150  | 1 cut (sm)   |
|    | Snake fruit                 | 75   | 1 pc         |
|    | Mangosteen                  | 60   | 1 pc         |
|    | .....                       |      |              |
|    | .....                       |      |              |

.....

| <b>V</b> | <b>Beverages</b>              |     |         |
|----------|-------------------------------|-----|---------|
|          | Tea                           | 3,7 | 1 tbsp. |
|          | Yogurt                        | 200 | 1 glass |
|          | Coffee                        | 182 | 1 glass |
|          | Cow milk                      | 200 | 1 glass |
|          | Soya milk                     | 200 | 1 glass |
|          | Condensed milk                | 200 | 1 glass |
|          | Unsweetened<br>condensed milk | 200 | 1 glass |
|          | .....                         |     |         |
|          | .....                         |     |         |
|          | .....                         |     |         |

| <b>VI</b> | <b>Local foods</b>                         |     |             |
|-----------|--------------------------------------------|-----|-------------|
|           | Papaya leaves                              | 100 | 35 pcs      |
|           | Ferns leaves                               | 100 | 25 pcs      |
|           | Moringa leaves                             | 100 | 1.5 glass   |
|           | Pisang louwe                               | 50  | 1 (med) cut |
|           | Pisang kapok                               | 50  | 1 (med) cut |
|           | Ubi Bete (Sweet<br>potato)                 |     |             |
|           | Sambiki (Summer<br>squash)                 | 100 | 1 (med) cut |
|           | Dalundung vegetable                        | 50  | 1 glass     |
|           | Gogos (White<br>glutinous rice)            | 162 | 1 pc        |
|           | Jaha rice (bamboo-<br>cooked rice)         | 160 | 1 pc        |
|           | Lalampa (white<br>glutinous rice and fish) | 50  | 1 (med) cut |
|           | Roa (Roa fish)                             | 50  | 1 (med) cut |
|           | Kadompe (Mackerel)                         | 50  | 1 (med) cut |
|           | .....                                      |     |             |
|           | .....                                      |     |             |

| <b>VII</b> | <b>Seasonings/<br/>ingredients</b> |    |             |
|------------|------------------------------------|----|-------------|
|            | Margarine                          | 5  | ½ tbsp.     |
|            | Fish oil                           | 5  | ½ tbsp.     |
|            | Palm sugar                         | 8  | ½ tbsp.     |
|            | Sugar                              | 8  | 1 tbsp.     |
|            | Honey                              | 10 | 1 ¼ tbsp.   |
|            | Coconut milk                       | 50 | ½ glass     |
|            | Coconut                            | 30 | 1 (sml) cut |
|            | .....                              |    |             |
|            | .....                              |    |             |
|            | .....                              |    |             |

**Table S2.** Categories and Definitions of the Study Variables.

| Predictors                            | Categories                                                                                                                   | Definition                                                                                                                                                                                                                                                                                                       |
|---------------------------------------|------------------------------------------------------------------------------------------------------------------------------|------------------------------------------------------------------------------------------------------------------------------------------------------------------------------------------------------------------------------------------------------------------------------------------------------------------|
| Stunting                              | Stunted<br>Non-stunted                                                                                                       | Height-for-age Z-score (HAZ) below -2 standard deviations less than the median of WHO child growth standard [1].                                                                                                                                                                                                 |
| Gender                                | Male*<br>Female                                                                                                              | Children's sex.                                                                                                                                                                                                                                                                                                  |
| Breastfeeding                         | Exclusive breastfeeding*<br>Mixed or formula feeding                                                                         | A way of feeding a baby or type of breastfeeding at six weeks.                                                                                                                                                                                                                                                   |
| Complementary feeding                 | Commenced complementary feeding at 6 months*<br>Not commenced complementary feeding at 6 months                              | Refers to the introduction of solids or semi-solids foods into an infant's diet at six months.                                                                                                                                                                                                                   |
| Had morbidity during the last 2 weeks | Absence of morbidity*<br>Had morbidity                                                                                       | Children's morbidity history in the last two weeks before the participants' interview.                                                                                                                                                                                                                           |
| Small-for-gestational age             | Non-SGA*<br>SGA                                                                                                              | Newborns size which are smaller according to their gestational age. SGA is defined as weight at birth below the 10 <sup>th</sup> percentile [2].                                                                                                                                                                 |
| Birth length status                   | Normal*<br>Short birth length                                                                                                | Low birth length has been defined as length at birth of <48 cm [3].                                                                                                                                                                                                                                              |
| Delivery process                      | Normal*<br>Caesarean section                                                                                                 | The method of childbirth delivery of the study participants.                                                                                                                                                                                                                                                     |
| Early initiation of breastfeeding     | Early initiation of breastfeeding*<br>Non-early initiation of breastfeeding                                                  | Newborn children who were put to the breast within one hour after birth.                                                                                                                                                                                                                                         |
| Pre-lacteal feeding                   | No*<br>Yes                                                                                                                   | Feeding practices in which newborn babies is given with any substance other than breast milk before initiating breastfeeding.                                                                                                                                                                                    |
| Number of ANC visits                  | Complete attendance for 4 visits ANC*<br>Incomplete attendance for 4 visits ANC                                              | The number of visits to healthcare provider for receiving antenatal care.                                                                                                                                                                                                                                        |
| Birth term status                     | Term birth (37-40 weeks) *<br>Preterm birth (< 37 weeks)                                                                     | The age of gestation at the time of giving birth. Divided into three categories, term, preterm, and post-term.                                                                                                                                                                                                   |
| Family health insurance               | All members have family health insurance<br>Some members have family health insurance<br>Do not have family health insurance | Family members covered by the government (so-called 'BPJS').                                                                                                                                                                                                                                                     |
| Labour at health facility             | Yes*<br>No                                                                                                                   | The location of childbirth delivery of study participant.                                                                                                                                                                                                                                                        |
| Supplementation Group                 | PG (Preconception-MMS)*<br>AG (Antenatal-MMS)<br>IG (Antenatal iron-folic acid)                                              | Type of supplementation given by the local government of Banggai during the study. Divide into three groups, multi-micronutrient supplementation receiving since pre-pregnancy (PG), multi-micronutrient supplementation receiving during pregnancy (AG), and other supplements receiving during pregnancy (IG). |
| Supplement consumption compliance     | Adequate supplement compliance ( $\geq 90$ capsules)*<br>Low supplement compliance ( $< 90$ capsules)                        | The number of supplements consumed during pregnancy.                                                                                                                                                                                                                                                             |

|                                     |                                                                                                           |                                                                                                                                                                                                                                                                                                                                                                                                                      |
|-------------------------------------|-----------------------------------------------------------------------------------------------------------|----------------------------------------------------------------------------------------------------------------------------------------------------------------------------------------------------------------------------------------------------------------------------------------------------------------------------------------------------------------------------------------------------------------------|
| Maternal energy intake              | Energy intake $\geq$ RDA*<br>Energy intake < RDA                                                          | Energy intake of the mothers during pregnancy                                                                                                                                                                                                                                                                                                                                                                        |
| Maternal height                     | $\geq 145$ cm*<br>< 145 cm                                                                                | A maternal height measured at the first visit.                                                                                                                                                                                                                                                                                                                                                                       |
| Maternal age at pregnancy           | Not at risk (20-35 years old)*<br>At risk (<20 and >35 years old)                                         | Maternal age during pregnancy at first visit.                                                                                                                                                                                                                                                                                                                                                                        |
| Mother's education                  | High (>12 years)*<br>Low ( $\leq 12$ years)                                                               | Category of the maternal education level.                                                                                                                                                                                                                                                                                                                                                                            |
| Mother's employment status          | Housewife*<br>Working                                                                                     | Category of the maternal occupation level.                                                                                                                                                                                                                                                                                                                                                                           |
| Mental health symptom               | None*<br>With symptom                                                                                     | The mental health state of the study participants was measured by self-reporting questionnaires to indicate the presence of mental health symptoms [4].                                                                                                                                                                                                                                                              |
| MUAC status                         | MUAC $\geq 23.5$ *<br>MUAC < 23.5 cm                                                                      | Maternal risk of malnutrition indicated by mid-upper arm circumference, with the cut-off points is 23.5 cm [5].                                                                                                                                                                                                                                                                                                      |
| Residence location                  | Regency's capital*<br>Subdistricts closer to regency's capital<br>Subdistricts far from regency's capital | The location where the study participants lived.                                                                                                                                                                                                                                                                                                                                                                     |
| Ethnicity                           | Indigenous (Banggai, Balantak, and Saluan tribes) *<br>Non-indigenous or immigrant                        | A particular ethnic group of the participants.                                                                                                                                                                                                                                                                                                                                                                       |
| Smoking exposure                    | No*<br>Yes                                                                                                | The smoking status of either study participants or family members living in the same house as the study participants.                                                                                                                                                                                                                                                                                                |
| Father's education                  | Academy*<br>High school<br>Middle school<br>Primary school/ no school                                     | Category of the paternal education level.                                                                                                                                                                                                                                                                                                                                                                            |
| Number of children under five years | < Two children*<br>$\geq$ Two children                                                                    | Category of the number of under-five children living in the house of the study participants.                                                                                                                                                                                                                                                                                                                         |
| Socioeconomic status (SES)          | Mid-high SES*<br>Low SES                                                                                  | The composite measure of household's cumulative living of standard, which was formed using principal component analysis (PCA).[6] This variable was derived from 10 variables, including ownership of vehicles, the use of cooking oil, bathroom sewerage condition, kitchen sewerage condition, latrine facility, house's floor material, house's wall material, drink water source, clean water source and income. |

---

An asterisk (\*) is used to indicate the reference category for categorical predictor variables.

**Table S3.** Univariate logistic regression of associated factors of stunting in early and later infancy.

| Associated factors                              | Early infancy            |                   | Later infancy            |                   |
|-------------------------------------------------|--------------------------|-------------------|--------------------------|-------------------|
|                                                 | OR (95% CI) <sup>a</sup> | p                 | OR (95% CI) <sup>a</sup> | p                 |
| <b>Infant factors</b>                           |                          |                   |                          |                   |
| Female                                          | 1.90 (0.83 – 4.37)       | 0.12 <sup>+</sup> | 1.33 (0.55 – 3.18)       | 0.52              |
| Mixed or formula feeding                        | 1.39 (0.37 – 5.18)       | 0.62              | -                        | -                 |
| Not commenced complementary feeding at 6 months | -                        | -                 | 0.68 (0.08 – 5.70)       | 0.72              |
| Had morbidity                                   | 1.31 (0.52 – 3.29)       | 0.56              | 2.67 (1.07 – 6.67)       | 0.035*            |
| Small-for-gestational-age                       | 4.37 (1.68 – 11.31)      | 0.002*            | 7.49 (2.79 – 20.08)      | <0.001            |
| Short birth length                              | 5.26 (1.95 – 14.17)      | 0.001*            | 3.17 (1.11 – 9.05)       | 0.03*             |
| Caesarean section                               | 0.60 (0.21 – 1.71)       | 0.33              | 0.55 (0.18 – 1.73)       | 0.31              |
| Had pre-lacteal feeding                         | 1.60 (0.70 – 3.64)       | 0.26              | 1.62 (0.67 – 3.89)       | 0.28              |
| Non-early initiation of breastfeeding           | 1.40 (0.62 – 3.19)       | 0.42              | 0.78 (0.32 – 1.90)       | 0.59              |
| <b>Maternal factors</b>                         |                          |                   |                          |                   |
| Incomplete attendance for 4 ANC visits          | 0.47 (0.13 – 1.70)       | 0.25              | 0.16 (0.02 – 1.26)       | 0.08 <sup>+</sup> |
| Preterm birth                                   | 5.92 (2.02 – 17.28)      | 0.001*            | 2.19 (0.69 – 6.95)       | 0.18 <sup>+</sup> |
| Do not have family health insurance             | 2.48 (0.70 – 9.16)       | 0.17 <sup>+</sup> | 0.80 (0.16 – 3.96)       | 0.78              |
| IG (Antenatal iron-folic acid)                  | 2.13 (0.51 – 8.85)       | 0.30              | 1.00 (0.19 – 5.59)       | 1.00              |
| Low supplements compliance                      | 0.42 (0.10 – 1.93)       | 0.26 <sup>+</sup> | 0.88 (0.24 – 3.25)       | 0.84 <sup>+</sup> |
| Maternal energy intake < RDA                    | 1.79 (0.38 – 8.31)       | 0.45              | 3.28 (0.41 – 26.02)      | 0.26 <sup>+</sup> |
| Maternal height <145 cm                         | 1.37 (0.35 – 5.33)       | 0.65              | 2.64 (0.74 – 9.41)       | 0.13 <sup>+</sup> |
| Maternal age at pregnancy at risk               | 0.69 (0.22 – 2.19)       | 0.53              | 1.20 (0.41 – 3.55)       | 0.74              |
| Low mother's education                          | 1.44 (0.46 – 4.54)       | 0.53              | 1.70 (0.47 – 6.15)       | 0.81              |
| Maternal MUAC < 23.5 cm                         | 2.84 (1.02 – 7.98)       | 0.04*             | 2.71 (0.92 – 7.98)       | 0.06 <sup>+</sup> |
| <b>Household factors</b>                        |                          |                   |                          |                   |
| Subdistricts far from regency's capital         | 2.91 (0.93 – 9.09)       | 0.06 <sup>+</sup> | 5.16 (1.53 – 17.41)      | 0.008*            |
| Non-indigenous or immigrant                     | 0.32 (0.13 – 0.74)       | 0.008*            | 0.36 (0.15 – 0.89)       | 0.02*             |
| Smoking exposure                                | 1.70 (0.67 – 4.33)       | 0.25              | 0.84 (0.34 – 2.08)       | 0.71              |
| Number of children U2 in the house >2 children  | 0.80 (0.34 – 1.92)       | 0.62              | 0.69 (0.27 – 1.77)       | 0.43              |

OR = Odds Ratio, CI = Confidence Interval; <sup>a</sup> there is no multicollinearity between variables; ANC= Antenatal care, RDA= Recommended dietary allowance, MUAC= mid-upper arm circumference; \*significant at the level <0.05; <sup>+</sup> variables were included in the multiple logistic regression model.

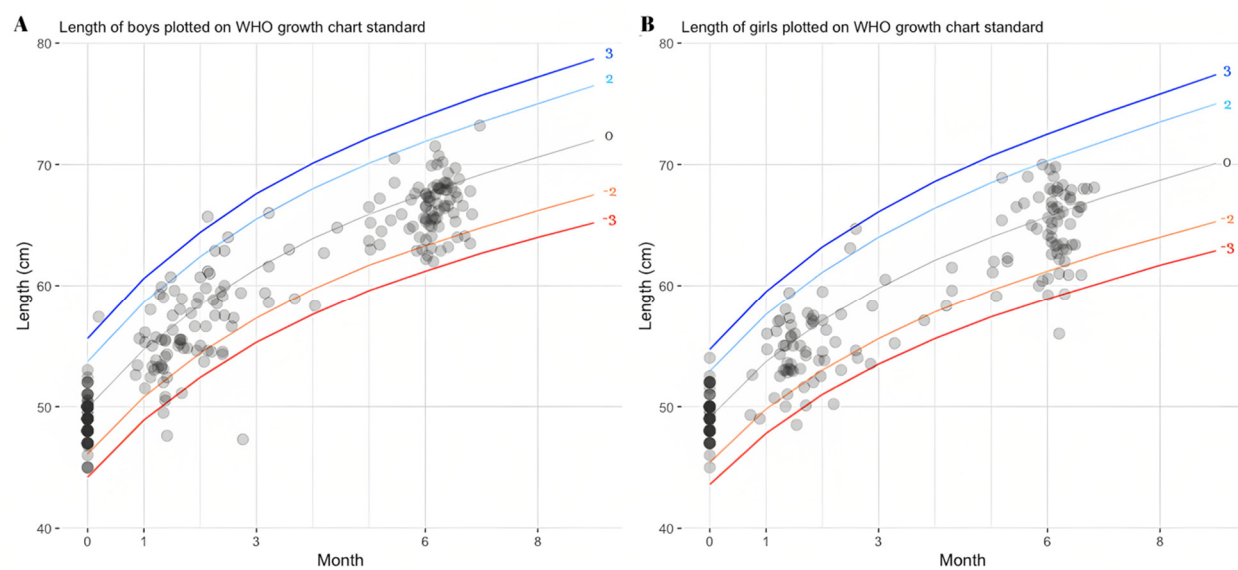

**Figure S1.** Length of boys (A) and girls (B) plotted on WHO growth chart.

1. WHO *Nutrition Landscape Information System (NLIS) country profile indicators: interpretation guide*; 2010; ISBN 9789415999555.
2. Pritchard, N.; Lindquist, A.; Siqueira, I. dos A.; Walker, S.P.; Permezel, M. INTERGROWTH-21st compared with GROW customized centiles in the detection of adverse perinatal outcomes at term. *J. Matern. Neonatal Med.* **2020**, *33*, 961–966, doi:10.1080/14767058.2018.1511696.
3. MoH *Laporan Nasional Riset Kesehatan Dasar (Riskesdas) tahun 2018*; Jakarta, Indonesia, 2019;
4. Westhuizen, C. van der; Wyatt, G.; Williams, J.K.; Stein, D.J.; Sorsdahl, K.; van der Westhuizen, C.; Wyatt, G.; Williams, J.K.; Stein, D.J.; Sorsdahl, K. Validation of the Self Reporting Questionnaire 20-Item (SRQ-20) for Use in a Low- and Middle-Income Country Emergency Centre Setting. *Int. J. Ment. Health Addict.* **2016**, *14*, 37–48, doi:10.1007/s11469-015-9566-x.
5. Sartika, A.N.; Khoirunnisa, M.; Meiyetrian, E.; Ermayani, E.; Pramesthi, I.L.; Nur Ananda, A.J. Prenatal and postnatal determinants of stunting at age 0–11 months: A cross-sectional study in Indonesia. *PLoS One* **2021**, *16*, 1–14, doi:10.1371/journal.pone.0254662.
6. Kumar, A.; Kumari, D.; Singh, A. Increasing socioeconomic inequality in childhood undernutrition in urban India: Trends between 1992-93, 1998-99 and 2005-06. *Health Policy Plan.* **2015**, *30*, 1003–1016, doi:10.1093/heapol/czu104.
